# Distinct MHC class I-dependent NK cell-activating receptors control cytomegalovirus infection in different mouse strains

Michał Pyzik,<sup>1,2,3</sup> Benoît Charbonneau,<sup>2,3</sup> Eve-Marie Gendron-Pontbriand,<sup>2,3</sup> Marina Babić,<sup>5</sup> Astrid Krmpotić,<sup>5</sup> Stipan Jonjić,<sup>5</sup> and Silvia M. Vidal<sup>1,2,3,4</sup>

<sup>1</sup>Department of Human Genetics, <sup>2</sup>Centre for the Study of Host Resistance, <sup>3</sup>Complex Traits Group, and <sup>4</sup>Department of Microbiology and Immunology, McGill University, Montreal, Quebec H3A 2T5, Canada  
<sup>5</sup>Department of Histology and Embryology, Faculty of Medicine, University of Rijeka, 51000 Rijeka, Croatia

**Recognition of mouse cytomegalovirus (MCMV)-infected cells by activating NK cell receptors was first described in the context of Ly49H, which confers resistance to C57BL/6 mice. We investigated the ability of other activating Ly49 receptors to recognize MCMV-infected cells in mice from various H-2 backgrounds. We observed that Ly49P1 from NOD/Ltj mice, Ly49L from BALB mice, and Ly49D2 from PWK/Pas mice respond to MCMV-infected cells in the context of H-2D<sup>k</sup> and the viral protein *m04/gp34*. Recognition was also seen in the H-2<sup>d</sup> and/or H-2<sup>f</sup> contexts, depending on the Ly49 receptor examined, but never in H-2<sup>b</sup>. Furthermore, BALB.K (H-2<sup>k</sup>) mice showed reduced viral loads compared with their H-2<sup>d</sup> or H-2<sup>b</sup> congenic partners, a reduction which was dependent on interferon  $\gamma$  secretion by Ly49L<sup>+</sup> NK cells early after infection. Adoptive transfer of Ly49L<sup>+</sup>, but not Ly49L<sup>-</sup>, NK cells significantly increased resistance against MCMV infection in neonate BALB.K mice. These results suggest that multiple activating Ly49 receptors participate in H-2-dependent recognition of MCMV infection, providing a common mechanism of NK cell-mediated resistance against viral infection.**

## CORRESPONDENCE

Silvia M. Vidal:  
silvia.vidal@mcgill.ca

Abbreviations used: IQR, interquartile range; KIR, killer cell immunoglobulin-like receptor; LAK cell, lymphokine-activated killer cell; MCMV, mouse CMV; MEF, mouse embryonic fibroblast; NKD, natural killer domain; NKR, NK cell receptor; p.i., post infection; TM, transmembrane.

NK cells are the effector lymphocytes of the innate immune system (Vivier et al., 2008). They can recognize and spontaneously kill transformed or infected cells, a function which is regulated by the integration of a multitude of signals from both inhibitory and activating germline-encoded NK cell receptors (NKR). NK cells have several cellular recognition mechanisms to distinguish between self and non-self (Lanier, 2005, 2008b). For one, they preferentially eliminate target cells that do not express normal levels of self-molecules, such as the highly polymorphic MHC class I proteins (H-2 class I in mice). Under normal circumstances, these molecules interact with inhibitory NKR, including the killer cell immunoglobulin-like receptors (KIRs) in humans and Ly49 receptors in rodents. Consequently, the target cell is recognized as self and no killing occurs, as ligand binding promotes the recruitment of phosphatases via an immunoreceptor tyrosine-based inhibition motif in the cytoplasmic tails of the receptors, generating an inhibitory signal. When surface expression of these

self-molecules is disrupted, as is the case in some viral infections, the inhibitory signal is abrogated and the target cell is lysed. This method is known as “missing self” recognition (Ljunggren and Kärre, 1985). In parallel, the infection induces the synthesis of stress and viral proteins that are expressed at the cell surface, proteins which closely resemble self-molecules or are associated with them. Some activating NKRs are able to bind these stress molecules, whereas others recognize viral proteins as non-self. This recognition mechanism can be called “stressed self” or “altered self,” respectively. Activating NKRs lack intrinsic signaling activity and instead associate with adaptor proteins containing immunoreceptor tyrosine-based activation motifs, such as DAP10 or DAP12, which initiate signal transduction cascades leading to NK cell granule

© 2011 Pyzik et al. This article is distributed under the terms of an Attribution-Noncommercial-Share Alike-No Mirror Sites license for the first six months after the publication date (see <http://www.rupress.org/terms>). After six months it is available under a Creative Commons License (Attribution-Noncommercial-Share Alike 3.0 Unported license, as described at <http://creativecommons.org/licenses/by-nc-sa/3.0/>).

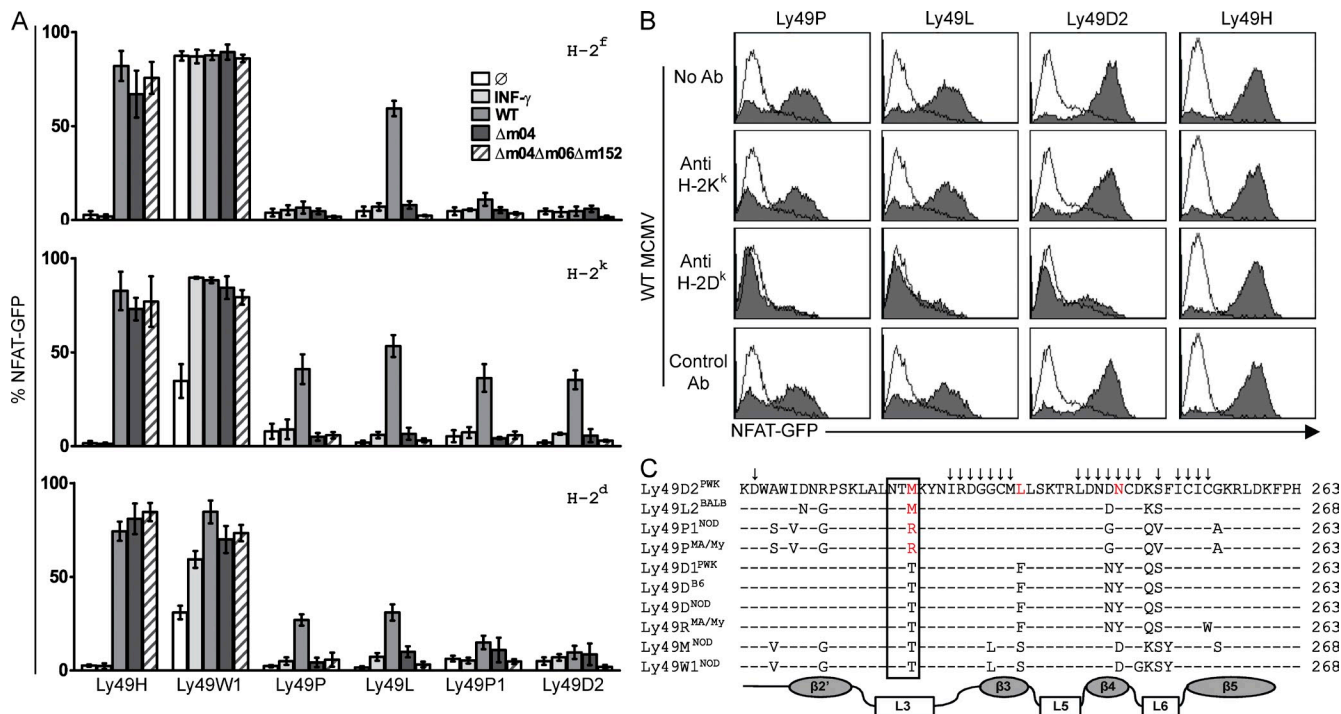

**Figure 1. Several activating Ly49 receptors recognize an MCMV-infected cell based on the presence of the *m04/gp34* viral peptide within a specific H-2 context.** (A) Percentages (mean  $\pm$  SD) of GFP expression by reporter cells carrying individual Ly49 receptors upon co-culture with MEF cells of the H-2<sup>f</sup> (top), H-2<sup>k</sup> (middle), or H-2<sup>d</sup> (bottom) haplotype under the following conditions: uninfected ( $\emptyset$ ), IFN- $\gamma$  pretreated (200 U), or infected at an MOI of 0.5 with WT,  $\Delta$ m04, or  $\Delta$ m04 $\Delta$ m06 $\Delta$ m152 MCMV. (B) GFP expression by reporter cells carrying individual Ly49 receptors upon co-culture with H-2<sup>k</sup> MEF cells that are either uninfected (thin line) or WT MCMV infected (gray filled line) in the absence (top) or presence of H-2<sup>k</sup> or H-2<sup>k</sup> blocking antibody (middle) or isotype control (bottom). (C) Sequence alignment of the predicted H-2-binding region of Ly49 NKDs based on the Ly49A:H-2D<sup>d</sup> crystal structure. Conserved residues between the Ly49 receptors are shown as dashes. Secondary structure elements are denoted by loops (white rectangles) and  $\beta$ -strands (gray ovals). Downward arrows represent putative MHC class I contact sites, whereas boxed residues delimit the NXT N-glycosylation motif. Residues in red represent amino acids unique in Ly49 receptors recognizing the infection in an *m04/gp34*-H-2-dependent manner. Sequences were retrieved from GenBank with the following accession nos.: Ly49D<sup>B6</sup>, AF349733.1; Ly49D<sup>NOD</sup>, AF218078.1; Ly49D1<sup>PKW</sup>, AY860975.1; Ly49L2<sup>BALB</sup>, AF204266; Ly49M<sup>NOD</sup>, AF283252.1; Ly49P<sup>MA/My</sup>, AY971807.1; Ly49P1<sup>NOD</sup>, AF218080.1; Ly49P<sup>MA/My</sup>, AF283377.1; and Ly49W1<sup>NOD</sup>, AF283250.1. Results from one of at least three experiments are shown.

mobilization, cytokine secretion, and ultimately the killing of the target cell (Lanier et al., 1998; Orr et al., 2009; Tassi et al., 2009).

The critical role of activating NKRs in viral infections has been best characterized in acute infection with mouse CMV (MCMV). As other members of the  $\beta$ -*Herpesviridae* family, MCMV has evolved immune-evasion strategies that allow unrestricted viral replication in most inbred mouse strains during the early stage of infection (Scalzo et al., 1995). A few strains, however, are naturally resistant to MCMV infection. In particular, C57BL/6 (B6) mice express the Ly49H-activating receptor that binds to m157, a viral MHC class I homologue expressed at the infected cell surface during the early phase of infection. This event triggers NK cell activation and elimination of the infected cells (Arase et al., 2002; Smith et al., 2002). There is overwhelming evidence supporting the central role of the Ly49H-m157 axis in MCMV resistance. Indeed, Ly49H transgenesis into genetically susceptible mouse strains renders them resistant to MCMV. Conversely, knocking out the *Ly49h* or *Dap12* genes in normally resistant animals

abrogates this resistance (Sjölin et al., 2002; Cheng et al., 2008; Fodil-Cornu et al., 2008). In addition, B6 mice become susceptible to MCMV infection when challenged with a mutant MCMV virus lacking the *m157* gene (Bubić et al., 2004). Notably, a second NK cell-dependent mechanism of resistance to MCMV was found in MA/My mice. Indeed, the epistasis between the *Ly49* and *H-2* loci underlies this resistance (Desrosiers et al., 2005). In this model, the activating Ly49P receptor requires both host H-2D<sup>k</sup> molecule and viral *m04/gp34* protein to mediate recognition of MCMV-infected cells (Kielczewska et al., 2009). These results indicate that in addition to Ly49H, the Ly49P receptor mediates resistance to MCMV infection yet through a different process. Therefore, it has prompted us to explore whether other Ly49-activating receptors share the ability to recognize MCMV infection in either a Ly49H or Ly49P manner.

In mice, a vast repertoire of Ly49 receptors has been described. To date, four *Ly49* haplotypes have been completely elucidated by genomic sequence analysis (Carlyle et al., 2008). Out of 15 *Ly49* genes, B6 mice possess two that

**Table I.** Recognition of WT MCMV-infected cell by Ly49 receptors in different H2 contexts

| Receptor | Haplotype | H2 <sup>d</sup> | H2 <sup>k</sup> | H2 <sup>a</sup> | H2 <sup>b</sup> | H2 <sup>g7</sup> | H2 <sup>a</sup> | H2 <sup>PWK</sup> | H2 <sup>r</sup> | H2 <sup>f</sup> | H2 <sup>-/-</sup> |
|----------|-----------|-----------------|-----------------|-----------------|-----------------|------------------|-----------------|-------------------|-----------------|-----------------|-------------------|
| C57BL/6  | Ly49D     | —               | —               | —               | —               | —                | —               | —                 | —               | —               | —                 |
| C57BL/6  | Ly49H     | +++             | +++             | +++             | +++             | +++              | +++             | +++               | +++             | +++             | +++               |
| MA/My    | Ly49P     | +               | ++              | —               | —               | —                | N.P.            | —                 | —               | —               | —                 |
| MA/My    | Ly49R     | —               | —               | —               | —               | —                | —               | —                 | —               | —               | —                 |
| MA/My    | Ly49U     | —               | —               | —               | —               | —                | —               | N.P.              | —               | —               | —                 |
| BALB/c   | Ly49L     | +               | ++              | —               | —               | —                | ++              | —                 | —               | ++              | —                 |
| NOD/Ltj  | Ly49D     | —               | —               | —               | —               | —                | —               | —                 | —               | —               | —                 |
| NOD/Ltj  | Ly49M     | —               | —               | —               | —               | —                | —               | N.P.              | —               | —               | —                 |
| NOD/Ltj  | Ly49P1    | —               | +               | —               | —               | —                | +               | —                 | —               | —               | —                 |
| NOD/Ltj  | Ly49W1    | +++             | +++             | —               | —               | —                | —               | —                 | —               | +++             | —                 |
| PWK/Pas  | Ly49D1    | —               | —               | —               | —               | —                | —               | N.P.              | —               | —               | —                 |
| PWK/Pas  | Ly49D2    | —               | +               | —               | —               | —                | —               | —                 | —               | —               | —                 |

+++ , 100–70% GFP<sup>+</sup> cells; ++ , 69–40% GFP<sup>+</sup> cells; + , 39–15% GFP<sup>+</sup> cells; — , <15% GFP<sup>+</sup> cells; N.P., not performed.

encode activating receptors (*Ly49d* and *h*). In contrast, the BALB/c strain has one activating receptor (*Ly49l*) out of seven *Ly49* genes. In 129 mice, three activating receptors (*Ly49r*, *u*, and *p*) can be found among 12 *Ly49* genes. Conversely, 7 out of 21 *Ly49* genes are activating in NOD/Ltj mice (*Ly49d*, *u*, *p3*, *p1*, *w*, *m*, and *h*; Carlyle et al., 2008). As opposed to their inhibitory counterparts, rare self-ligands have been described for activating Ly49 receptors (Ly49P<sup>NOD</sup> and Ly49D<sup>B6</sup> can recognize H-2D<sup>d</sup>, whereas Ly49W<sup>NOD</sup> can recognize both H-2D<sup>d</sup> and H-2D<sup>k</sup>; George et al., 1999; Silver et al., 2000, 2001). Although some are known to recognize viral proteins, many remain orphans.

In this paper, we demonstrate that the Ly49L<sup>BALB</sup>-, Ly49P1<sup>NOD</sup>-, and Ly49D2<sup>PWK</sup>-activating receptors can recognize MCMV-infected cells in an *m04/gp34*-specific H-2-dependent manner. Among them is a novel activating receptor isolated from the wild-derived mouse strain PWK/Pas. Moreover, the improved ability of BALB.K (H-2<sup>k</sup>) mice to control MCMV proliferation in the spleen relative to BALB/c (H-2<sup>d</sup>) or BALB.By (H-2<sup>b</sup>) mice is NK cell dependent. In addition, we show that it correlates with the specific expansion and IFN- $\gamma$  secretion from Ly49L<sup>+</sup> NK cells in these mice. Finally, the survival of neonate mice after MCMV infection is increased upon adoptive transfer of Ly49L<sup>+</sup> NK cells. These results suggest that the *m04/gp34*-specific H-2-dependent detection of infected cells by activating Ly49 receptors is a common mechanism of host defense, whereas Ly49H-m157 recognition remains restricted to B6 mice.

## RESULTS

### Multiple activating Ly49 receptors recognize an MCMV-infected cell based on the presence of the *m04/gp34* viral peptide and of a specific H-2 context

Given the close relationship between MCMV and its host, we examined the ability of activating Ly49 receptors to respond to MCMV-infected cells in different H-2 contexts. For this, we cloned 13 activating Ly49 receptors into 2B4 cells expressing

the M2-tagged DAP12 adaptor protein. Equivalent Ly49 expression and functionality in reporter cells was assessed with  $\alpha$ -M2 antibody (unpublished data). Reporter cells were co-cultured with a panel of mouse embryonic fibroblast (MEF) cells of different H-2 haplotype (H-2<sup>d</sup>, H-2<sup>k</sup>, H-2<sup>b</sup>, H-2<sup>a</sup>, H-2<sup>r</sup>, H-2<sup>f</sup>, H-2<sup>g7</sup>, H-2<sup>a</sup>, H-2<sup>PWK</sup>, and H-2<sup>-/-</sup>) under various conditions (Fig. 1 and Table I). As expected, Ly49H reporter cells were stimulated by MCMV-infected MEFs independently of the H-2 background as a result of the presence of the viral molecule m157 on the surface of infected cells (Arase et al., 2002). No stimulation was observed for Ly49D<sup>B6</sup>-, Ly49D<sup>NOD</sup>-, Ly49M<sup>NOD</sup>-, Ly49R<sup>MA/My</sup>-, Ly49U<sup>MA/My</sup>-, and Ly49D1<sup>PWK</sup>-bearing 2B4 cells under any of the conditions tested (Table I). Ly49W1 reporter cells were stimulated MEF cells of H-2<sup>d</sup>, H-2<sup>k</sup>, or H-2<sup>f</sup> haplotype irrespective of the condition tested (Fig. 1 A). In contrast, in addition to Ly49P<sup>MA/My</sup>, three other reporter cell lines, Ly49L<sup>BALB</sup> (Ly49L), Ly49P1<sup>NOD</sup> (Ly49P1), and Ly49D2<sup>PWK</sup> (Ly49D2), were stimulated both in an MCMV- and H-2-dependent fashion. However, the extent of functional recognition for each receptor was different. Ly49P1-expressing cells were weakly stimulated by uninfected or infected H-2<sup>d</sup> MEFs but responded robustly by MCMV-infected cells of the H-2<sup>k</sup> background. Ly49D2 reporters were only stimulated by infected H-2<sup>k</sup> MEFs. Ly49L reporter cell activation was MCMV dependent in multiple H-2 contexts, with the strongest activation observed in H-2<sup>f</sup> (~60%), intermediate in H-2<sup>k</sup> (~50%), and weak in H-2<sup>d</sup> (< 40%) contexts (Fig. 1 A).

To examine the role of the *m04/gp34* molecule in receptor recognition, reporter cells were co-cultured with MEFs infected with two different deletant MCMVs. The first deletant lacked the ORF encoding *m04/gp34* alone ( $\Delta m04$ ), whereas the second lacked three ORFs encoding *m04/gp34*, *m06/gp48*, and *m152/gp40* ( $\Delta m04\Delta m06\Delta m152$ ; Fig. 1 A). The *m06/gp48* and *m152/gp40* products are immunoevasins that down-regulate MHC class I expression (Jonjić et al., 2008). Therefore, cells infected with mutant  $\Delta m04\Delta m06\Delta m152$

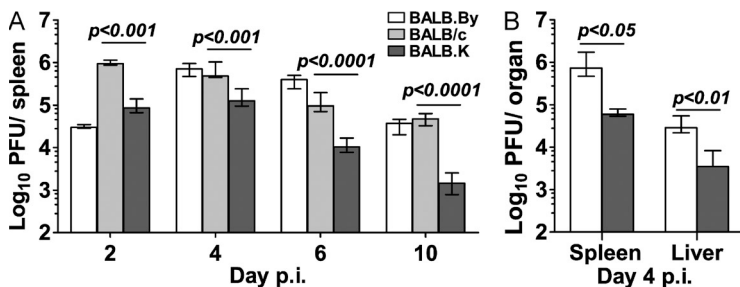

**Figure 2. Effective control of MCMV proliferation in BALB mice depends on the H-2 haplotype.** (A) BALB.By (H-2<sup>b</sup>), BALB/c (H-2<sup>d</sup>), and BALB.K (H-2<sup>k</sup>) mice were infected with either  $2.5 \times 10^3$  PFU/mouse (BALB.By) or  $5 \times 10^3$  PFU/mouse (BALB/c and BALB.K) of MCMV. Viral titers were assessed in the spleen at days 2, 4, 6, and 10 p.i. (B) Day-4 viral titers in the spleen and liver of BALB.By and BALB.K mice infected with  $2.5 \times 10^3$  PFU/animal are shown. The data are presented as median viral titer  $\pm$  interquartile range (IQR). The number of animals used at each time point is between 4 and 12 and represents four pooled experiments.

MCMV express high levels of MHC class I molecules as opposed to WT or  $\Delta m04$ -infected cells (Fig. S1). Ly49H reporter cells were stimulated by MEFs infected with both WT and MCMV mutant viruses. Ly49W1 reporter cells were stimulated in all conditions, further demonstrating that their activation depends on the presence of H-2 molecules rather than MCMV viral proteins. In contrast, the absence of *m04/gp34* effectively reduced the activation of Ly49P1, Ly49D2, or Ly49L reporter cells even with high levels of MHC class I expression (Fig. 1 A). To examine the involvement of the MHC class I molecules, reporter cell assays were carried out in the presence of anti-H-2D<sup>k</sup>, anti-H-2K<sup>k</sup>, or control IgG antibodies (Fig. 1 B). Stimulation of the reporter cells was abolished specifically in the presence of anti-H-2D<sup>k</sup> antibodies, demonstrating that the ability of Ly49D2, Ly49P1, and Ly49L to recognize MCMV-infected cells depends on the presence of the H-2D<sup>k</sup> molecule. Thus, we identified three additional haplotype-specific Ly49 stimulatory receptors that share a common H-2-dependent recognition mechanism of MCMV-infected cells with Ly49P<sup>MA/My</sup> 2B4 reporter cells involving the *m04/gp34* viral protein and H-2D<sup>k</sup> molecules.

Structurally, activating receptors that recognize MCMV-infected cells conditional on their H-2 background belong to group II (because of the absence of predicted helix  $\alpha 3$  within loop L3; Deng et al., 2008). The amino acid sequence alignment of their natural killer domain (NKD) regions revealed

three common features shared by four receptors that were identified beforehand. Those include a threonine to arginine/methionine substitution at position 224 resulting in the loss of a glycosylation motif at position 221–223, as well as a conserved leucine and asparagine residues at position 234 and 244, respectively (Fig. 1 C). Whether and how these residues influence MCMV recognition remain to be established.

### NK cell-mediated control of MCMV replication in BALB mice depends on H-2 haplotype

BALB mice possess the smallest described Ly49 repertoire, with only four Ly49 receptors expressed on mature NK cells (Ly49A, C, G, and L; Ortaldo et al., 1999; Van Beneden et al., 2001; Gays et al., 2006). Moreover, the availability of BALB animals congenic for different H-2 loci offers the opportunity to examine in vivo the role of Ly49L<sup>+</sup> NK cells in H-2<sup>d</sup>, H-2<sup>b</sup>, or H-2<sup>k</sup> contexts. At a dose of  $5 \times 10^3$  PFU, viral replication rapidly progressed in BALB.K (H-2<sup>k</sup>) mice, reaching Log<sub>10</sub>  $5 \pm 0.1$  PFU at 2 d post infection (p.i.) However, starting at day 4, viral load decreased, culminating at Log<sub>10</sub>  $3 \pm 0.2$  PFU by day 10 p.i. This reduction was not seen at the same level in BALB/c (H-2<sup>d</sup>) mice, which showed viral titers 50-fold higher than those of BALB.K mice by day 6 p.i. and were moribund by day 10 p.i. (Fig. 2 A). At the same dose, BALB.By (H-2<sup>b</sup>) mice succumbed between days 3 and 4 p.i. (not depicted); however, even upon infection with half the normal dose ( $2.5 \times 10^3$  PFU), they had a significantly higher viral load than BALB.K mice by day 4 p.i. (Fig. 2, A and B). Interestingly, the MCMV viral load in the liver of BALB.K mice was fourfold lower by day 4 p.i. than in BALB.By mice (Fig. 2 B), yet the viral load difference between BALB.K and BALB/c mice only became significant

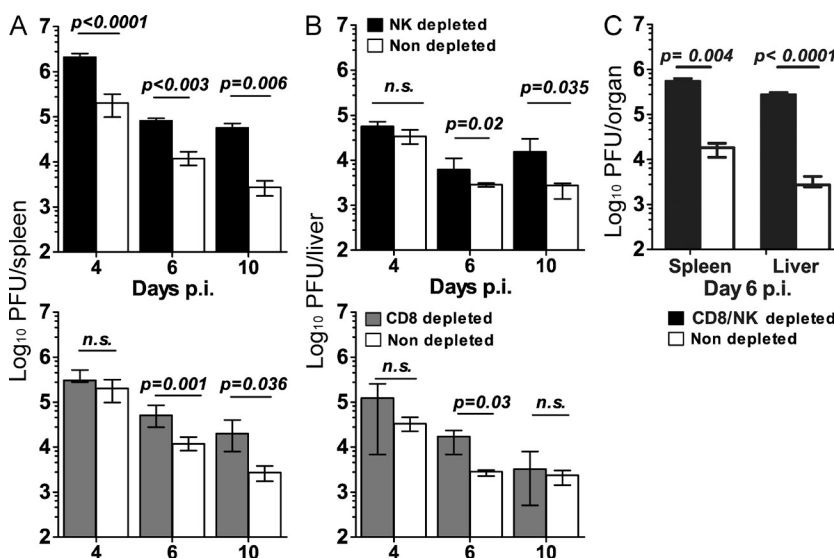

**Figure 3. Effective early and late control of MCMV proliferation in BALB.K mice depends on NK cells, whereas CD8<sup>+</sup> T cells become involved later.** (A and B) BALB.K mice were depleted of NK cells (top), CD8<sup>+</sup> T cells (bottom), or both (C) before WT MCMV infection. Viral titers were assessed at different time points p.i. in the spleen (A and B, top) and liver (A and B, bottom). The data represent three pooled experiments (median viral titer  $\pm$  IQR) with three to four mice per experiment.

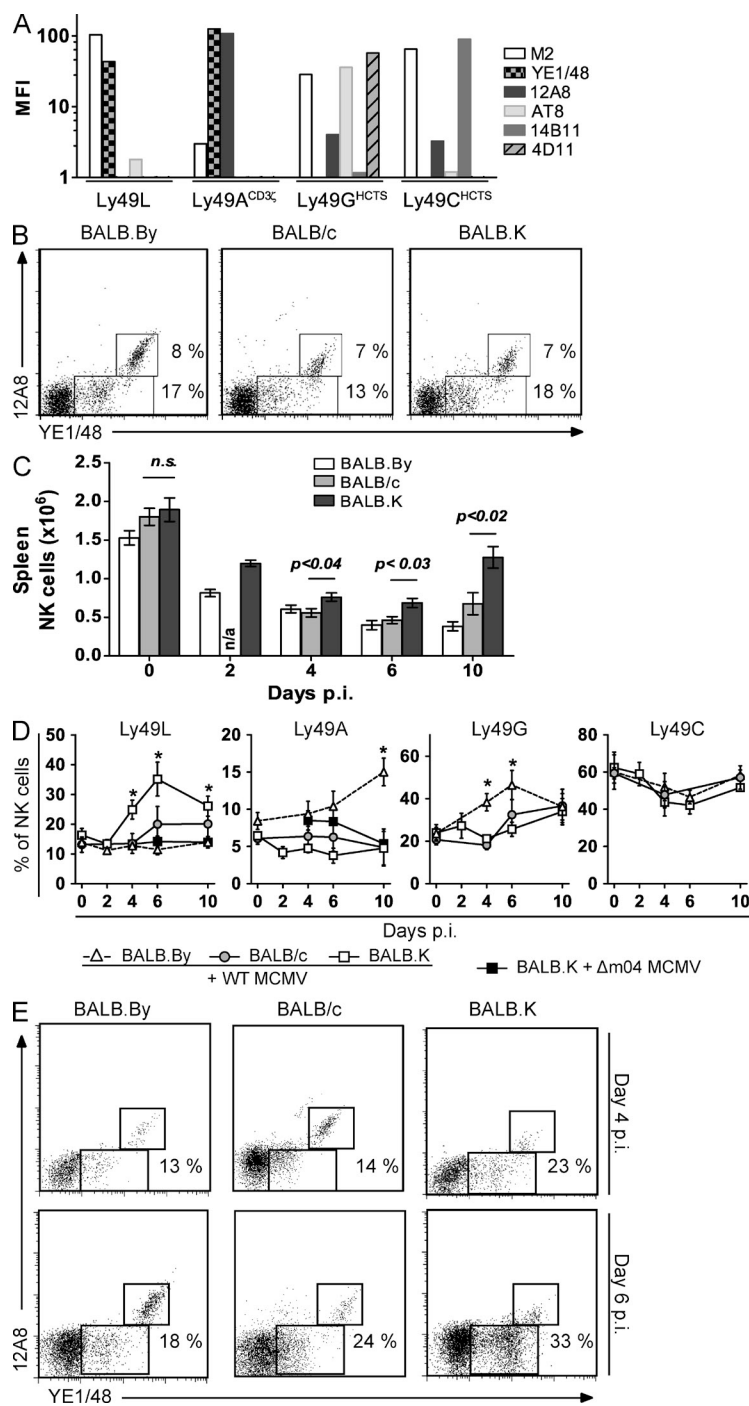

**Figure 4. H-2 and m04/gp34-specific proliferation of Ly49L<sup>+</sup> NK cells in BALB mice during MCMV infection.**

(A) 2B4 reporter cells expressing Ly49 receptors from the BALB repertoire were stained with a panel of Ly49-specific antibodies as well as with anti-M2 (DAP12) antibody. MFI is shown. (B) Freshly extracted splenocytes from BALB congenic mice were stained for NK cells and different Ly49 receptors. YE1/48 and 12A8 antibody staining is shown. YE1/48 stains a double population of NK cells with either high or intermediate intensity. The intermediate population is not stained by the anti-Ly49A-specific clone (12A8) and represents the fraction of NK cells expressing the activating Ly49L receptor. BALB.By, BALB/c, or BALB.K mice were infected with WT or Δm04 MCMV. Their spleens were collected at different time points p.i. (C and D) The number of NK cells (C) and the percentages of Ly49A<sup>+</sup>, Ly49G<sup>+</sup>, or Ly49L<sup>+</sup> NK cell fractions (D) were determined. Asterisks denote p-values <0.05. (E) Representative dot plots of Ly49A and Ly49L expression on NK cells from BALB.By, BALB/c, or BALB.K mice infected with WT MCMV at day 4 and 6 p.i. Data are from three experiments (mean ± SD) with three to four mice per group. n/a, not available.

increased virus titers although with different patterns. The effect of NK cell depletion was seen from day 4 to 10 p.i. in the spleen, but it became apparent in the liver at later time points (days 6 and 10 p.i.; Fig. 3, A and B, top). In contrast, the effect of CD8<sup>+</sup> T cell depletion was observed earlier in the liver (days 4 and 6) and later in the spleen (days 6 and 10) over the course of infection (Fig. 3, A and B, bottom). Interestingly, splenic viral titers continued to decrease over the course of the infection after either NK cell or CD8<sup>+</sup> T cell depletion, demonstrating that both lymphocyte populations contribute to viral clearance from day 6 p.i. onward. Indeed, when both cell populations were depleted at the same time, a >100-fold increase in viral titers was observed in all organs tested by day 6 p.i. and mice were moribund shortly after (Fig. 3 C and not depicted). CD4<sup>+</sup> T cells have also been shown to play a role during the chronic phase of MCMV infection, especially in the salivary gland (Polić et al., 1998; Lee et al., 2009; Andrews et al., 2010). We thus depleted BALB.K mice of CD4<sup>+</sup> T cells and infected them with WT MCMV. At all time points p.i., the viral titers in the spleen and liver were equivalent in depleted and nondepleted animals (Fig. S3, A and B). It is of note that the control of virus replication in BALB.By mice was not affected by the depletion of NK cells (Fig. S3 C). Thus, NK cells have a nonredundant role in the early control of spleen viral titer, in addition to contributing substantially to viral spread at later time points, in conjunction with CD8<sup>+</sup> T cells.

**Specific expansion of Ly49L<sup>+</sup> NK cells during MCMV infection**  
Ly49H<sup>+</sup> NK cell expansion is a hallmark of the NK cell response in the prototype B6 MCMV-resistant strain. To examine the dynamics of NK cell subpopulations during infection, we

starting at day 10 p.i. (Fig. S2). Therefore, BALB.K mice have an enhanced ability to control MCMV replication in the spleen and the liver compared with BALB.By or BALB/c animals, although this ability becomes evident at different time points.

In BALB.K animals, NK or CD8<sup>+</sup> T cells might be involved in the control of viral replication (Yang et al., 1985; Ehl et al., 1996; Polić et al., 1998; Krmpotic et al., 2003; Sumaria et al., 2009). Injection of BALB.K mice with anti- $\alpha$ -asialo-GM1 or with anti-CD8 antibodies, which preferentially deplete NK cells or CD8<sup>+</sup> T cells, respectively, resulted in significantly

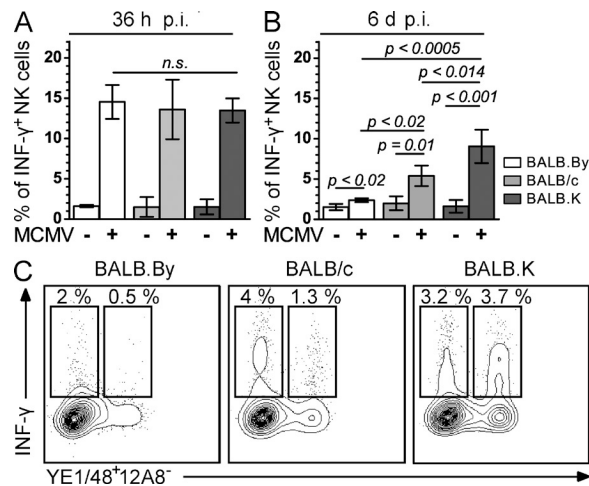

**Figure 5. Preferential IFN- $\gamma$  secretion of the Ly49L<sup>+</sup> NK cell subpopulation at day 6 p.i. in BALB.K mice.** BALB.By, BALB/c, and BALB.K mice were infected with 2,500 PFU/mouse of MCMV i.p. At 36 h and 6 d p.i., the spleens were collected, negatively enriched for NK cells, and activated with plate-bound  $\alpha$ -NKG2D antibody followed by CD3, DX5, YE1/48, 12A8, and IFN- $\gamma$  staining. Percentages of total IFN- $\gamma$ <sup>+</sup> NK cells gated on CD3<sup>+</sup>DX5<sup>+</sup> are shown at 36 h (A) and 6 d (B) p.i. (C) Representative contour plots of 12A8-YE1/48<sup>INT</sup>IFN- $\gamma$ <sup>+</sup> NK cells. Data represent one of two experiments performed (mean  $\pm$  SD) with three to four mice per group.

determined the specificities of available antibodies using the reporter cells expressing BALB Ly49 receptors described previously. The antibodies 14B11 and 4D11 stained Ly49C and Ly49G reporter cells, respectively. The YE1/48 antibody stained both Ly49A and Ly49L reporter cells, although Ly49L with lesser affinity. The 12A8 antibody specifically bound Ly49A reporter cells. Thus, Ly49A<sup>+</sup> cells were defined by YE1/48<sup>+</sup>12A8<sup>+</sup> antibody staining, and Ly49L<sup>+</sup> cells as YE1/48<sup>INT</sup>12A8<sup>+</sup> antibody-stained cells (Fig. 4 A). Using antibody combinations, flow cytometric analysis of fresh NK

cells or lymphokine-activated killer cells (LAK cells) from BALB.K, BALB.By, or BALB/c was performed. All strains showed similar frequencies of Ly49A<sup>+</sup> (10%), Ly49C<sup>+</sup> (50%), Ly49G<sup>+</sup> (22%), and Ly49L<sup>+</sup> (15%) subpopulations (Fig. 4 B; and Fig. S4, A–C).

Upon MCMV infection, total NK cell numbers decreased in the three strains studied; however, the reduction was comparatively less pronounced in BALB.K mice, which had significantly higher NK cell numbers over the course of infection (Fig. 4 C). The frequencies of Ly49A<sup>+</sup>, Ly49C<sup>+</sup>, and Ly49G<sup>+</sup> NK cells remained similar in infected mice, except in the BALB.By strain. In these mice, the percentage of Ly49A<sup>+</sup> NK cells increased from 10 to 18% of the total NK cell population by day 10 p.i. The Ly49G<sup>+</sup> NK cell subpopulation had also expanded to represent 40% of total NK cells by day 6 p.i. In contrast, the frequency of the Ly49L<sup>+</sup> NK cell fraction remained unchanged in BALB.By mice, whereas a small but significant increase (from 15 to 20% from day 6 p.i.) was observed in BALB/c mice. Ly49L<sup>+</sup> NK cell expansion was most notable in BALB.K mice, where the frequency of this fraction increased to 25 and then 40% from day 4 to 6 p.i. (Fig. 4, D and E). Notably, Ly49L<sup>+</sup> NK cell expansion was abolished in BALB.K mice upon infection with  $\Delta m04$  MCMV, suggesting that cell proliferation was responsive to the presence of the viral *m04*/gp34 molecule (Fig. 4, D and E; and Fig. S4 D). Therefore, NK cell control of viral replication in BALB.K mice correlates with the *m04*/gp34 dependent expansion of Ly49L<sup>+</sup> NK cells.

**Ly49L<sup>+</sup> NK cell secretion of IFN- $\gamma$  during MCMV infection**  
In the model of Ly49H-dependent control of MCMV infection in B6 mice, there is an early nonspecific activation of NK cells, which can be detected through NK cell IFN- $\gamma$  production. There is also a late Ly49H-specific MCMV-dependent phase of NK cell activation (Daniels et al., 2001; Dokun et al., 2001). To further characterize the impact of H-2 on NK activation

**Table II.** Contribution of Ly49L<sup>+</sup> NK cells to the production of IFN- $\gamma$  36 h and 6 d p.i. after MCMV infection

| Mouse strain and condition tested | Percentage of total IFN- $\gamma$ <sup>+</sup> NK cells | Percentage of Ly49L <sup>+</sup> NK cells |
|-----------------------------------|---------------------------------------------------------|-------------------------------------------|
| BALB.By                           |                                                         |                                           |
| Uninfected                        | 1.52 $\pm$ 0.40                                         | 12.33 $\pm$ 3.07                          |
| +MCMV (36 h p.i.)                 | 14.55 $\pm$ 2.13                                        | 17.33 $\pm$ 6.76                          |
| +MCMV (Day 6 p.i.)                | 2.26 $\pm$ 0.24                                         | 16.50 $\pm$ 1.27                          |
| BALB/c                            |                                                         |                                           |
| Uninfected                        | 1.99 $\pm$ 0.873                                        | 10.69 $\pm$ 1.44                          |
| +MCMV (36 h p.i.)                 | 13.60 $\pm$ 3.70                                        | 13.37 $\pm$ 1.18                          |
| +MCMV (day 6 p.i.)                | 5.4 $\pm$ 1.28                                          | 23.47 $\pm$ 9.00                          |
| BALB.K                            |                                                         |                                           |
| Uninfected                        | 1.63 $\pm$ 0.79                                         | 10.13 $\pm$ 2.58                          |
| +MCMV (36 h p.i.)                 | 13.45 $\pm$ 4.67                                        | 11.65 $\pm$ 5.26                          |
| +MCMV (day 6 p.i.)                | 9.06 $\pm$ 2.07                                         | 53.6 $\pm$ 2.0                            |

In this table, we show the percentage of IFN- $\gamma$ -producing NK cells among the total DX5<sup>+</sup>CD3<sup>+</sup> splenocyte pool at two different time points after infection (percentage of total). The contribution of the Ly49L<sup>+</sup> NK cells to the production of IFN- $\gamma$  was calculated by dividing the percentage of Ly49L<sup>+</sup>IFN- $\gamma$ <sup>+</sup> by the total percentage of IFN- $\gamma$ <sup>+</sup> NK cells. Data represent the percent mean  $\pm$  SD of three mice per group from one of two experiments performed.

in the BALB model, we examined NK cell production of IFN- $\gamma$  at 36 h and 6 d p.i. with MCMV. At the initial time point, intracellular staining of IFN- $\gamma$  after restimulation revealed a similar frequency of IFN- $\gamma$ -producing cells ( $\sim 20\%$ ) in the BALB.By, BALB/c, and BALB.K strains. Within this subset of cells, the Ly49L<sup>+</sup> NK fraction represented only a minority of total NK cells, that is to say  $\sim 15\%$  (Fig. 5 A and Table II). By day 6 p.i., IFN- $\gamma$  production by NK cells decreased significantly in all strains, although this decrease was the least pronounced in BALB.K mice (Fig. 5). This correlates with our observation that Ly49L<sup>+</sup> NK cells were the main IFN- $\gamma$  producers in BALB.K mice. Conversely, the Ly49L<sup>+</sup> NK cells from BALB/c and BALB.By mice were responsible for only a small fraction of IFN- $\gamma$  production in these strains, although this proportion was significantly higher in BALB/c (Fig. 5, B and C; and Table II). Therefore, whereas there is nonspecific IFN- $\gamma$  production by NK cells at 36 h p.i., preferential IFN- $\gamma$  secretion by Ly49L<sup>+</sup> NK is observed by day 6 p.i. after restimulation in BALB.K mice.

#### Naive Ly49L<sup>+</sup> NK cells protect neonate BALB.K mice against MCMV infection

The transfer of adult naive Ly49H<sup>+</sup> NK cells into neonatal mice is sufficient to protect against MCMV infection (Bukowski et al., 1985; Sun et al., 2009). Thus, to investigate the protective potential of Ly49L<sup>+</sup> NK cells we used adoptive transfer into 3–5-d-old pups 1 d before MCMV infection (Fig. 6 A). We negatively selected NK cells, sorted Ly49L<sup>+</sup> (YE1/48<sup>INT</sup>12A8<sup>-</sup>) or Ly49L<sup>-</sup> (YE1/48<sup>-</sup>12A8<sup>-</sup>) NK cells from adult BALB.K female mice, and injected various numbers of each cell fraction in pups (Fig. 6 B). Neonates injected with PBS alone were used as negative control, whereas transfer of NK cells from resistant MA/My mice were used as positive control. Neonates receiving the Ly49L<sup>-</sup> NK cell fraction were not protected and, similar to the PBS-treated group, succumbed by day 8 p.i. regardless of the cell number injected (Fig. 6 C and not depicted). In contrast, 64% of neonatal mice receiving  $10^5$  NK cells from MA/My survived the infection. Protection conferred by Ly49L<sup>+</sup> NK cells was dose dependent. Survival of infected mice receiving  $4 \times 10^4$  Ly49L<sup>+</sup> NK cell fraction was increased by  $\sim 1$  wk compared with  $10^4$  NK cell transfer, even though none of the neonates survived. Markedly, 40% of mice receiving  $7 \times 10^4$  Ly49L<sup>+</sup> NK cells survived 3 wk p.i. (Fig. 6 C). Finally, at the same time, the transfer of Ly49L<sup>+</sup> NK cell fraction significantly reduced viral titers in the spleens of neonates compared with Ly49L<sup>-</sup> NK cell transfer or PBS-injected controls (Fig. 6 D). Thus, the Ly49L<sup>+</sup> NK cell fraction restricted the viral load and was ultimately more protective than Ly49L<sup>-</sup> NK cells against MCMV infection.

#### DISCUSSION

A protective role of Ly49-activating receptor during virus infection has been amply demonstrated in B6 mice, whose NK cells are activated through an Ly49H–m157 axis (Lanier, 2008a). Another NK cell-dependent mechanism of MCMV

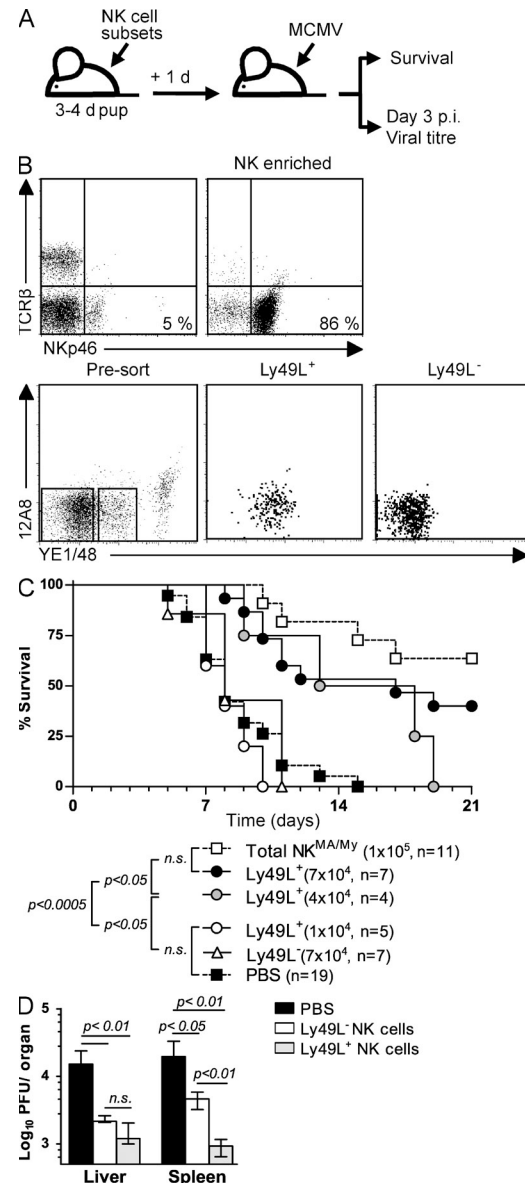

**Figure 6. Adoptive transfer of naive Ly49L<sup>+</sup> NK cells into BALB.K neonates improves their survival after MCMV infection.** (A) Adoptive transfer scheme. (B) Sorting gate position and purity. (C) Survival of BALB.K neonate mice receiving Ly49L<sup>+</sup> NK cells ( $1 \times 10^4$ ,  $4 \times 10^4$ , or  $7 \times 10^4$ ), Ly49L<sup>-</sup> NK cells ( $7 \times 10^4$ ), total MA/My NK cells ( $1 \times 10^5$ ), or PBS as a control, followed by MCMV infection at a dose of 1,000 PFU/pup. Data represent four pooled experiments. (D) Viral titers at day 3 p.i. in neonate pups transferred with  $1 \times 10^5$  of either Ly49L<sup>+</sup> or Ly49L<sup>-</sup> NK cells or PBS only (median viral titer  $\pm$  IQR). Three pups per condition were tested. Data represent one of two experiments performed.

resistance, which has been associated with the ability of activating Ly49P receptor to recognize H-2D<sup>k</sup> and m04/gp34 on the MCMV-infected cell, has been described in MA/My mice (Desrosiers et al., 2005; Kielczewska et al., 2009). Although the involvement of Ly49P was validated in vitro, the same cannot be said for in vivo studies because no appropriate antibody was available to properly delimit the Ly49P population.

Furthermore, those two Ly49-activating receptors recognize infected cells by different mechanisms, raising the question of whether a finite number of Ly49-activating receptors is used to tackle many different pathogens or whether there is a preferential specificity of certain activating receptors for MCMV. Our results revealed that the latter seems to be the case. Reporter cells expressing Ly49P1<sup>NOD</sup>, Ly49L<sup>BALB</sup>, or Ly49D2<sup>PWK</sup> recognize MCMV-infected MEFs. Remarkably, their mode of recognition is H-2 dependent, with a preference for H-2<sup>k</sup> and sometimes for H-2<sup>d</sup> and H-2<sup>f</sup> haplotypes, requiring the presence of the viral *m04/gp34* protein. Thus, these three Ly49 haplotype-specific receptors are capable of recognizing MCMV infection in an H-2D<sup>k</sup>- and *m04/gp34*-restricted manner, along with Ly49P.

Amino acid sequence alignment of the activating Ly49 receptors assayed in our study has yielded new clues into the mechanism of *m04/gp34*- and H-2-dependent MCMV recognition. Three residues were found to be conserved among activating Ly49 receptors capable of recognizing the infection and absent in those that are not: methionine/arginine (M/R) at position 223, and leucine (L) and asparagines (N) residues at position 234 and 244, respectively. Interestingly, the two latter are localized to  $\beta$ 3 and  $\beta$ 4 sheets, which are predicted to be involved in the binding with the H-2 class I molecules. Moreover, M/R at position 223 removes an N-glycosylation (NTT) site shared by the receptors that do not recognize infection. Previous studies have shown that glycosylation at this site affects Ly49 receptor binding to H-2 class I molecules. For example, a mutation in Ly49A promoting glycosylation at NTT (221–223) prevented H-2D<sup>d</sup> tetramer binding, whereas alteration of this motif in Ly49D and the subsequent loss of glycosylation increased its ability to bind the tetramer (Mason et al., 2003). The importance of receptor glycosylation has also been observed in T lymphocytes. Indeed, mice deficient for the enzyme that performs N-glycosylation have enhanced TCR clustering and a lower activation threshold. During CD8<sup>+</sup> T cell development, glycosylation of the CD8  $\beta$ -chain decreases avidity to H-2 class I molecules (Demetriou et al., 2001; Moody et al., 2001). Thus, it is possible that lack of a functional glycosylation motif facilitates binding of the activating Ly49 receptors to H-2 class I molecules on MCMV-infected cells. Of course, the specific involvement of the M/R<sup>223</sup>, L<sup>234</sup>, and N<sup>244</sup> residues in the recognition of MCMV-infected cells will have to be assessed through site-directed mutagenesis and direct binding assays of soluble forms of the receptors. Nevertheless, the available data suggest that these residues are in direct contact with the H-2 class I molecule rather than with viral *m04/gp34* protein, which remains essential for this mechanism of recognition.

The *m04/gp34* protein is thought to stabilize the H-2 on the surface of infected cells; however, *m04/gp34* has not yet been shown to directly interact with activating Ly49 receptors on the surface of infected cells. Furthermore, we have previously shown that *m04/gp34* is necessary but not sufficient for recognition of infection by Ly49P<sup>MA/My</sup>-expressing reporter cells, yet it remains to be established whether an

additional host or pathogen factor is also involved in viral recognition by the three receptors described in this paper (Kielczewska et al., 2009). Hence, this viral protein might induce an allosteric change or cluster H-2 molecules on the surface of infected cells, thus allowing a longer and stronger interaction with activating Ly49 receptors. The questions remain of which is the additional host or viral molecule in addition to *m04/gp34* that is necessary to promote recognition of the infected cell by activating Ly49 receptors, and whether it is shared by all the receptors. Then again, is it a stress or viral peptide produced during infection, which is part of the H-2D<sup>k</sup>-gp34 complex or its presentation by specific H-2 molecules? Most studies show that Ly49 receptors recognized H-2 molecules independently of the peptide being presented under normal conditions. Yet some receptors might be sensitive to a possible peptide-induced allosteric change in H-2 (Correa and Raullet, 1995; Orihuela et al., 1996; Hanke et al., 1999).

The prevalence of the *m04/gp34*-dependent method of viral recognition suggests an important role for this viral peptide in immunoevasion. We have recently shown that the  $\Delta$ *m04* virus is attenuated in most susceptible strains, including BALB.K, as the protein it encodes abolishes NK cell activation via the missing-self recognition mechanism (Babić et al., 2010). Indeed, *m04/gp34* escorts MHC class I molecules to the surface of infected cells, thus maintaining a level of surface MHC expression sufficient enough to trigger several inhibitory NKRs (Kavanagh et al., 2001; Babić et al., 2010). For instance, Ly49A-bearing reporters recognize uninfected cells; however, a much stronger, *m04*-dependent response is observed upon co-culture of these reporters with MCMV-infected cells. Therefore, in BALB.K mice both activating and inhibitory Ly49 receptors are triggered by *m04/gp34*-H-2 complexes. However, as the frequency of Ly49L<sup>+</sup> NK cells is low, initially the predominant signal is *m04*-dependent inhibition. In the case of *m04/gp34* ablation, NK cell inhibition is removed allowing enhanced early control of virus replication even if Ly49L<sup>+</sup> NK cell activation is also absent.

Our next step was to investigate the role of these three activating receptors in vivo. Experiments focusing on the Ly49L receptor were particularly telling. For instance, 15% of NK cells in uninfected BALB mice express the activating Ly49L receptor. Yet after MCMV infection, the kinetic analysis of the Ly49 repertoire demonstrated a specific expansion of the Ly49L<sup>+</sup> NK cell fraction starting at day 4 p.i. in BALB.K mice, which was not the case in BALB.By mice; in this case, BALB/c mice displayed an intermediate phenotype. Interestingly, no such Ly49L<sup>+</sup> NK cell proliferation was observed upon infection with  $\Delta$ *m04* MCMV, indicating that Ly49L<sup>+</sup> NK cells need to sense the *m04/gp34* product to respond to infection. The expansion was correlated with an increased ability to control the infection, as well as increased IFN- $\gamma$  secretion by H-2<sup>k</sup> Ly49<sup>+</sup> NK cells after day 6 p.i. This was also seen in H-2<sup>d</sup> mice, although to a much lesser extent, and was entirely absent in H-2<sup>b</sup> mice. All in all, these findings demonstrate that Ly49L<sup>+</sup> NK cells in the context of H-2<sup>k</sup> are specifically activated during MCMV infection. In another

experiment, adoptive transfer of a Ly49L<sup>+</sup> cell fraction significantly extended the life span of neonate pups after MCMV infection, a protection not seen when a Ly49L<sup>-</sup> fraction was transferred. In this assay, naive Ly49L<sup>+</sup> NK cells provide in vivo control of viral load. Recently, rechallenged NK cells have been shown to proliferate better and to secrete more IFN- $\gamma$  than their naive counterparts (Cooper et al., 2009; Sun et al., 2009). In an adoptive transfer experiment, low numbers of rechallenged NK cells provided protection from MCMV, whereas naive NK cells did not. A dose-dependent protection by the naive Ly49L<sup>+</sup> NK cells can also be seen; indeed, the transfer of  $7 \times 10^4$  of those cells was able to improve mice survival to the same extent as a transfer of  $10^5$  total naive NK cells from resistant MA/My mice. Therefore, the transfer of Ly49L<sup>+</sup> NK cells isolated from mice previously infected with MCMV (i.e., memory NK cells) could provide better protection to neonate mice than the transfer of naive NK cells. Collectively these results point to a central role of the activating Ly49L receptor in the control of viral spread. By analogy with the response of Ly49H<sup>+</sup> NK cells during infection, one possible interpretation of these results is that Ly49L<sup>+</sup> NK cells are being activated through a Ly49L-*m04*/gp34-H-2D<sup>k</sup> axis, leading to elimination of MCMV-infected cells.

Despite having an activating receptor capable of recognizing the infection, viral titers in the spleen of BALB.K mice are elevated during the initial phase of the infection. This could be a result of three important facts. First, the Ly49L<sup>+</sup> NK cell population is small in the absence of infection, only accounting for ~15% of total splenic NK cells. Therefore, the initial inability of BALB.K to control MCMV proliferation could simply be the result of an insufficient number of effector cells. In comparison, 28% of splenic NK cells express Ly49H in Tg915 mice (transgenic for Ly49H). This is enough to make them significantly less resistant to MCMV infection than B6 mice, in which 50% of total splenic NK cells are Ly49H<sup>+</sup> (Lee et al., 2003). Second, surface expression of *m04*/gp34 is dependent on its association with H-2, yet H-2 is rapidly modulated by other viral immunoevasins such as *m152*/gp40 and *m06*/gp48, which, respectively, retain it in the cis-Golgi compartment of the endoplasmic reticulum or redirect it to endosome-lysosome pathway for degradation (Kleijnen et al., 1997; Ziegler et al., 1997). This can limit the amount of available ligand with which Ly49L can interact. In contrast, *m157*, the ligand for Ly49H, is ubiquitously expressed starting at 4 h p.i. Third, competition with other inhibitory Ly49 receptors expressed on the same NK cell (e.g., Ly49C and Ly49G) could alleviate activation mediated by Ly49L<sup>+</sup> NK cells (Babić et al., 2010). These inhibitory signals might overcome Ly49L signaling and drive the NK cell to unresponsiveness rather than activation. At later time points, though, the specific expansion of Ly49L<sup>+</sup> NK cells may amplify the activating signal to a point where it overwhelms inhibition and induces NK cell activation, which also serves to initiate the adaptive immune response.

Ly49G and Ly49A are known to bind to H-2D<sup>k</sup> and H-2D<sup>d</sup> molecules (Chung et al., 2000; Silver et al., 2002). Thus,

Ly49A<sup>+</sup> and/or Ly49G<sup>+</sup> NK cells will only receive inhibitory signals through these receptors in those two H-2 contexts. Therefore, expansion of these NK cell subpopulations—in the H-2<sup>b</sup> context specifically—could result in nonspecific NK cell activation. This may be mediated by an inflammatory milieu that is not balanced by the inhibitory signals of Ly49A and Ly49G in the absence of their ligands. Furthermore, the Ly49G<sup>+</sup> NK cell fraction has been shown to expand in C57BL/6 mice upon MCMV, vaccinia virus, mouse hepatitis virus, and lymphocytic choriomeningitis virus infection, as well as in MA/My mice upon MCMV infection (Daniels et al., 2001; Xie et al., 2009; Babić et al., 2010). Moreover the increase in this NK fraction could be a negative regulatory mechanism to control activation of NK cells.

Even though the protection against MCMV infection conferred by Ly49L was restricted to the H-2D<sup>k</sup> context, our in vitro analysis showed that Ly49L-expressing 2B4 reporter cells were able to recognize MCMV infection in the H-2<sup>d</sup> context. BALB/c mice were more resistant than BALB.By mice, as shown by the equivalent splenic viral titers at any given time point, even though the BALB/c mice were challenged with twice the viral dose. We also detected an expansion of the splenic Ly49L<sup>+</sup> NK cell subpopulation, as well as greater secretion of IFN- $\gamma$  upon restimulation at day 6 p.i. in the BALB/c strain. Although it was not the purpose of our study, one might speculate that the inhibitory NK cell pathways differ among H-2 congenic BALB strains. Specifically, the threshold of NK cell activation might be higher in BALB.By and BALB/c mice than in BALB.K mice as a result of more potent and overwhelming pathways of NK cell inhibition. Whether this is actually the case remains to be determined.

In addition to Ly49L, other activating receptors were considered in this study, including Ly49D2, which was isolated from the resistant wild-derived strain PWK/Pas. Haplotype analysis showed significant similarity between PWK/Pas and B6 at *Ly49h* locus, yet NK cells in PWK/Pas animals were negative for Ly49H. Moreover, PWK/Pas mice are completely resistant to infection with  $\Delta m157$  MCMV, as opposed to B6 mice (Adam et al., 2006). However, MCMV resistance in PWK/Pas is determined by a major locus, *Cmv4*, with only a small contribution of H-2. Furthermore, the endogenous H-2<sup>PWK</sup> haplotype is the susceptibility allele, and Ly49D2 reporter cells are not stimulated in the endogenous H-2<sup>PWK</sup> background. All of this suggests the involvement of other receptors in the resistance phenotype. Regardless of the identity of *Cmv4*, our results indicate the presence of at least one Ly49-activating receptor in each of the five *Ly49* haplotypes capable of recognition of MCMV infection. It is noteworthy that in four examples the mechanism of recognition implicates a host class I molecule, indicating that such is a common mechanism of Ly49-activating receptor recognition as opposed to direct binding to a viral protein as afforded by Ly49H.

Although MCMV recognition is at the core of this paper, some activating receptors were found to recognize uninfected MEF cells. We identified a new endogenous ligand for the Ly49W<sup>NOD</sup> receptor, H-2<sup>f</sup>, in addition to the previously

identified H-2D<sup>k</sup> and H-2D<sup>d</sup> molecules (Kane et al., 2001). Thus, although Ly49W-expressing reporter cells were not stimulated by H-2<sup>g7</sup> MEFs, the endogenous NOD *H-2* haplotype, autoimmunity or anergy could result from having an activating NKR with affinity for a cognate self-H-2 molecule. Recently, it has been shown that anergy is the most likely outcome. For instance, chimeric mice constitutively expressing *m157* display hyporesponsive Ly49H<sup>+</sup> NK cells after MCMV infection (Sun and Lanier, 2008; Tripathy et al., 2008). However, the physiological relevance and the functional role of the activating Ly49W receptor, capable of binding to self H-2 molecules, need to be further studied, namely in NOD mice congenic for *H-2<sup>k</sup>* or *H-2<sup>l</sup>*. Nevertheless, it seems that the impact of Ly49W on NK cell homeostasis would not be affected in NOD mice.

The present study has improved our grasp of NK cell-mediated recognition of MCMV in a mouse model. Undoubtedly, parallels can be made with HCMV infection in humans. However, KIRs, which have a homologous function to Ly49 receptors, have not been directly implicated in HCMV-infected cell recognition. Yet NK cell involvement is undeniable. For instance, individuals with NK cell deficiencies are hypersusceptible to infection with herpesviruses, HCMV among them (Biron et al., 1989; Orange et al., 2002). Furthermore, HCMV seropositive patients have increased circulating levels of NKG2C<sup>+</sup> NK cells compared with uninfected individuals; upon in vitro co-culture with HCMV-infected fibroblasts, the NKG2C<sup>+</sup> NK cell fraction specifically proliferates (Gumá et al., 2004, 2006). Moreover, a significantly reduced risk of HCMV reactivation was reported in sibling transplantations where the donor had more than one activating KIR (Cook et al., 2006). Individuals with different KIR repertoires respond differentially to infection with other viruses such as HIV. For example, the activating KIR3DS1 receptor mediates host protection to HIV infection when its ligand HLA-Bw4-80I is expressed on infected cells (Martin et al., 2002). KIR3DS1<sup>+</sup> NK cells were also shown to specifically expand during acute HIV-1 infection given the presence of HLA-B Bw4-80I (Alter et al., 2009).

Ancient viruses, namely CMVs, have coevolved with their respective host. Our study suggests that the host–pathogen interaction led to the emergence of numerous combinations of both activating and inhibitory NKRs and MHC class I molecules to control infection. We propose that human HCMV studies do not possess the necessary power to detect the most protective effects among different but varied NK receptor–MHC class I combinations. However, based on our studies, we are sure that functional assessments of receptor–ligand pairs involved in the recognition of HCMV-infected cells are well rationalized.

## MATERIALS AND METHODS

**Mice.** BALB.By, BALB.K, BALB/c, B10.M-*H2f/n*MobJ, B10.RIII-*H2r*/(71NS)nMobJ, FVB/NJ, C57BL/6, and A/J mice were purchased from The Jackson Laboratory. NOD/LtJ and PWK/Pas mice were provided by C.A. Piccirillo (McGill University, Montreal, Canada) and F. Colucci (University of Cambridge, Cambridge, UK), respectively. Animal protocols or

experiments were approved by the Canadian Council on Animal Care and the McGill University Animal Resources Center. Unless otherwise specified, all animals were between 8 and 10 wk of age. Donor mice were 8–12 wk old.

**Cloning.** Ly49H, Ly49C, Ly49P, Ly49U, and Ly49R reporter cells were generated as previously described (Kielczewska et al., 2009). Ly49A, Ly49D, and Ly49G from C57BL/6, Ly49A, Ly49L, and Ly49G from BALB, Ly49P, Ly49M, Ly49D, and Ly49W from NOD/LtJ, and Ly49D1 and Ly49D2 from PWK/Pas were cloned into pMx-puromycin vectors using specific primers (Table S1) as previously described (Arase et al., 2002). 2B4 reporter cells were generated as previously described (Fodil-Cornu et al., 2010). Chimera protein receptors were generated by joining the NKD from each aforementioned inhibitory Ly49 to the backbone (cytoplasmic/transmembrane [TM]/stalk: CTS) of activating Ly49H as described by Kielczewska et al. (2007). The CD3ζ-Ly49A<sup>TM</sup>-NKR-P1A construct was a gift from W.H. Yokoyama (Washington University School of Medicine, St. Louis, MO). Using this, a Ly49A-CD3ζ chimera was generated in a threefold manner. First, the CD3ζ and the Ly49A NKD-stalk domain were amplified by PCR from their respective vectors. Specific primers that also allowed the partial amplification of the Ly49A TM domain in each construct (located in the 5' end and in the 3' end for the CD3ζ and Ly49A constructs, respectively) and the addition of an Esp3I restriction site were used. Second, both PCR products were digested with Esp3I and ligated (Thermo Fisher Scientific) together as follows: CD3ζ-Ly49A<sup>TM</sup>-Esp3I and Esp3I-Ly49A<sup>TM</sup>/Stalk/NKD (ligation site in the Ly49A TM domain).

**Virus stocks, mouse infections, and virus titration.** The Smith strain of MCMV was obtained from the American Type Culture Collection. Salivary gland stocks were prepared by propagation in 3-wk-old BALB/c mice as previously described (Desrosiers et al., 2005). 7–8-wk-old mice were injected i.p. with  $5 \times 10^3$  or  $2.5 \times 10^3$  PFU/mouse of MCMV or tissue culture grown  $5 \times 10^5$  PFU/mouse of  $\Delta m04$  MCMV. Viral titers in various organs were assessed by plaque assay as previously described (Desrosiers et al., 2005). For NK and/or CD8 T cell depletion experiments, mice were injected i.v. with either 30  $\mu$ l  $\alpha$ -asialo-GM1 (Wako Chemicals USA) or 250  $\mu$ g  $\alpha$ -CD8 mAb (clone: H35-17.2.4; gift from M. Pierres, Centre d'Immunologie de Marseille-Luminy, Marseille, France) 48 h before infection. Viral titers were assessed at days 4 and 6 p.i. To assess viral titers at day 10, mice were injected one additional time at day 4 p.i. As plaque assays were performed, depletion was assessed by FACS. The  $\Delta m04$ ,  $\Delta m04\Delta m06\Delta m152$ , and WT BAC-derived (MW97.01) viruses were previously described (Wagner et al., 1999).

**Flow cytometry, NK cell enrichment, and sorting.** Antibodies used were the following: NKp46 (29A1.4; FITC, PE, or Alexa Fluor 647 conjugated; eBioscience), Pan-NK cells (DX5; FITC, PE, or Alexa Fluor 647 conjugated; eBioscience), Ly49A (YE1/48; FITC, PE, or biotin conjugated and purified; BioLegend), Ly49A/D (12A8; PE conjugated; eBioscience), Ly49G (4D11; FITC or PerCP-eFluor710 conjugated; eBioscience), Ly49G (AT8; PE conjugated; eBioscience), Ly49C (14B11; FITC or biotin conjugated; eBioscience), Flag-M2 (Sigma-Aldrich), donkey  $\alpha$ -mouse IgG (polyclonal; PE conjugated; eBioscience), IFN- $\gamma$  (XMG1.2; PerCP-Cy5.5 conjugated; eBioscience), CD3 $\epsilon$  (145-2C11; PerCP-Cy5.5 conjugated; eBioscience), CD8 $\alpha$  (53-6.7; FITC or PE conjugated; eBioscience), TCR- $\beta$  (H57-597; FITC conjugated; eBioscience), H-2D<sup>k</sup> (15-5-5; unconjugated or FITC conjugated; eBioscience), H-2D<sup>d</sup> (34-2-12S; FITC conjugated; eBioscience), H-2K<sup>d</sup> (SF1-1.1; FITC conjugated; eBioscience), H-2K<sup>k</sup> (36-7-15; unconjugated or FITC conjugated; eBioscience), IgG2a isotype control (biotin conjugated; eBioscience), and streptavidin (FITC, PE, APC, PerCP-Cy5.5, or eFluor450 conjugated; eBioscience). Spleens from infected mice were collected in 4 ml of 2% DME and macerated with cell strainers. 3/4 of the sample was used to assess the viral titer via plaque assay, and 1/4 was treated with Ack's lysis buffer, washed in cold PBS, and stained for various specific surface markers. In particular, the best demarcation of the Ly49L<sup>+</sup> NK cell fraction was seen after surface staining and a mild 15-min fixation in 4% paraformaldehyde (Stewart et al., 2007).

To enrich NK cells and/or to FACS sort them, spleens were harvested from BALB mice, perfused with cold PBS and macerated. The resulting cell suspension was treated with ACK's lysis buffer and resuspended in PBS with 10% FBS. Next, the sample was negatively enriched in NK cells with the NK cell isolation kit (Miltenyi Biotec) according to the manufacturer's instructions. In the case of adaptive transfers, the negative fraction (>75% NK cell purity) was stained with specific surface markers and sorted with the FACSaria (BD). For IFN- $\gamma$  staining,  $2 \times 10^5$  enriched NK cells or splenocytes/well were plated in 96-well plates and activated with 5  $\mu$ g/ml of plate-bound Nkp46 (R&D systems) and 1  $\mu$ g/ml NKG2D (clone: A10; eBioscience) mAb for 4 h. Alternately, cells were stimulated with 50  $\mu$ g/ml PMA/1  $\mu$ g/ml ionomycin (Sigma-Aldrich). Intracellular markers were stained according to the manufacturer's conditions (Cytofix/Cytoperm Plus Fixation/Permeabilization kit with GolgiPlug; BD). Cells were acquired on a FACSCalibur (BD), FACSCanto II (BD), or CyAN (Beckman Coulter) and analyzed by FlowJo (7.6; Tree Star) analysis program.

**Adoptive transfers.** 3–5-d-old BALB.K suckling mice were used as recipients. Before use in experiments, neonates from different litters were pooled together and randomly reassigned, with a maximum of nine pups per lactating female. Groups of four to nine mice were given an i.p. injection with 50  $\mu$ l of given cell population. The next day, mice were infected with  $10^3$  PFU per pup of salivary gland MCMV in a volume of 50  $\mu$ l. Mice were monitored daily for survival. Some were killed 3 or 6 d later, and their spleens and livers removed and used for virus titration or FACS analysis as described in the previous sections. Controls were neonates injected with PBS or total MACS enriched NK cells from resistant MA/My mice.

**Cell culture.** MEFs were prepared as previously described (Desrosiers et al., 2005). Reporter cell assay and H-2 blocking studies were performed as previously described (Desrosiers et al., 2005). LAK cells were prepared as previously described (Fodil-Cornu et al., 2008).

**Statistics.** Differences between groups were calculated with one-way ANOVA analysis assuming not-repeated measures, followed by Bonferroni post tests. Otherwise, a two-tailed unpaired Student's *t* test was used. Results with *P* < 0.05 were considered significant.

**Online supplemental material.** Fig. S1 shows MHC class I expression during MCMV infection. Fig. S2 shows hepatic MCMV proliferation in BALB mice. Fig. S3 shows that depletion of CD4<sup>+</sup> T cells has no influence on MCMV viral titers in BALB.K mice in spleen or liver. Fig. S4 shows Ly49 repertoire in BALB congenic mice. Online supplemental material is available at <http://www.jem.org/cgi/content/full/jem.20101831/DC1>.

We thank K. Aube, P. d'Arcy, C. Lacroix, G. Perrault, and N. Prud'homme for exquisite animal handling. We thank M.H. Lacombe, K. McDonald, E. Massicotte, and M. Dupuis for cell sorting. We thank Drs. A. Kielczewska and N. Fodil-Cornu for critical reading of the paper. We thank G. Leiva-Torres for assistance in virus preparation.

This study was supported by Canadian Institutes of Health Research MOP-7781 (S.M. Vidal), EU FP7, REGPOT-2008-1-01 (S. Jonjić) and Croatian Ministry of Science grants 0621261-1263 (S. Jonjić). A. Krmpotić is supported by the Howard Hughes Medical Institute International Research Scholars grant. M. Babić is supported by the Croatian Ministry of Science. M. Pyzik is supported by CIHR Doctoral Award. S.M. Vidal is a Canada Research Chair.

The authors declare no competing financial interests.

Submitted: 2 September 2010

Accepted: 10 March 2011

## REFERENCES

- Adam, S.G., A. Caraux, N. Fodil-Cornu, J.C. Loredó-Osti, S. Lesjean-Pottier, J. Jaubert, I. Bubic, S. Jonjić, J.L. Guénet, S.M. Vidal, and F. Colucci. 2006. Cmv4, a new locus linked to the NK cell gene complex, controls innate resistance to cytomegalovirus in wild-derived mice. *J. Immunol.* 176:5478–5485.
- Alter, G., S. Rihn, K. Walter, A. Nolting, M. Martin, E.S. Rosenberg, J.S. Miller, M. Carrington, and M. Altfeld. 2009. HLA class I subtype-dependent expansion of KIR3DS1+ and KIR3DL1+ NK cells during acute human immunodeficiency virus type 1 infection. *J. Virol.* 83:6798–6805. doi:10.1128/JVI.00256-09
- Andrews, D.M., M.J. Estcourt, C.E. Andoniou, M.E. Wikstrom, A. Khong, V. Voigt, P. Fleming, H. Tabarias, G.R. Hill, R.G. van der Most, et al. 2010. Innate immunity defines the capacity of antiviral T cells to limit persistent infection. *J. Exp. Med.* 207:1333–1343. doi:10.1084/jem.20091193
- Arase, H., E.S. Mocarski, A.E. Campbell, A.B. Hill, and L.L. Lanier. 2002. Direct recognition of cytomegalovirus by activating and inhibitory NK cell receptors. *Science*. 296:1323–1326. doi:10.1126/science.1070884
- Babić, M., M. Pyzik, B. Zafirova, M. Mitrović, V. Butorac, L.L. Lanier, A. Krmpotić, S.M. Vidal, and S. Jonjić. 2010. Cytomegalovirus immunoevasion reveals the physiological role of "missing self" recognition in natural killer cell dependent virus control in vivo. *J. Exp. Med.* 207:2663–2673. doi:10.1084/jem.20100921
- Biron, C.A., K.S. Byron, and J.L. Sullivan. 1989. Severe herpesvirus infections in an adolescent without natural killer cells. *N. Engl. J. Med.* 320:1731–1735. doi:10.1056/NEJM198906293202605
- Bubić, I., M. Wagner, A. Krmpotić, T. Saulig, S. Kim, W.M. Yokoyama, S. Jonjić, and U.H. Koszinowski. 2004. Gain of virulence caused by loss of a gene in murine cytomegalovirus. *J. Virol.* 78:7536–7544. doi:10.1128/JVI.78.14.7536-7544.2004
- Bukowski, J.F., J.F. Warner, G. Dennert, and R.M. Welsh. 1985. Adoptive transfer studies demonstrating the antiviral effect of natural killer cells in vivo. *J. Exp. Med.* 161:40–52. doi:10.1084/jem.161.1.40
- Carlyle, J.R., A. Mesci, J.H. Fine, P. Chen, S. Bélanger, L.H. Tai, and A.P. Makrigiannis. 2008. Evolution of the Ly49 and Nkrp1 recognition systems. *Semin. Immunol.* 20:321–330. doi:10.1016/j.smim.2008.05.004
- Cheng, T.P., A.R. French, B.F. Plougastel, J.T. Pingel, M.M. Orihuela, M.L. Buller, and W.M. Yokoyama. 2008. Ly49h is necessary for genetic resistance to murine cytomegalovirus. *Immunogenetics*. 60:565–573. doi:10.1007/s00251-008-0313-3
- Chung, D.H., K. Natarajan, L.F. Boyd, J. Tormo, R.A. Mariuzza, W.M. Yokoyama, and D.H. Margulies. 2000. Mapping the ligand of the NK inhibitory receptor Ly49A on living cells. *J. Immunol.* 165:6922–6932.
- Cook, M., D. Briggs, C. Craddock, P. Mahendra, D. Milligan, C. Fegan, P. Darbyshire, S. Lawson, E. Boxall, and P. Moss. 2006. Donor KIR genotype has a major influence on the rate of cytomegalovirus reactivation following T-cell replete stem cell transplantation. *Blood*. 107:1230–1232. doi:10.1182/blood-2005-03-1039
- Cooper, M.A., J.M. Elliott, P.A. Keyel, L. Yang, J.A. Carrero, and W.M. Yokoyama. 2009. Cytokine-induced memory-like natural killer cells. *Proc. Natl. Acad. Sci. USA*. 106:1915–1919. doi:10.1073/pnas.0813192106
- Correa, I., and D.H. Raulet. 1995. Binding of diverse peptides to MHC class I molecules inhibits target cell lysis by activated natural killer cells. *Immunity*. 2:61–71. doi:10.1016/1074-7613(95)90079-9
- Daniels, K.A., G. Devora, W.C. Lai, C.L. O'Donnell, M. Bennett, and R.M. Welsh. 2001. Murine cytomegalovirus is regulated by a discrete subset of natural killer cells reactive with monoclonal antibody to Ly49H. *J. Exp. Med.* 194:29–44. doi:10.1084/jem.194.1.29
- Demetriou, M., M. Granovsky, S. Quaggin, and J.W. Dennis. 2001. Negative regulation of T-cell activation and autoimmunity by Mga5 N-glycosylation. *Nature*. 409:733–739. doi:10.1038/35055582
- Deng, L., S. Cho, E.L. Malchiodi, M.C. Kerzic, J. Dam, and R.A. Mariuzza. 2008. Molecular architecture of the major histocompatibility complex class I-binding site of Ly49 natural killer cell receptors. *J. Biol. Chem.* 283:16840–16849. doi:10.1074/jbc.M801526200
- Desrosiers, M.P., A. Kielczewska, J.C. Loredó-Osti, S.G. Adam, A.P. Makrigiannis, S. Lemieux, T. Pham, M.B. Lodoen, K. Morgan, L.L. Lanier, and S.M. Vidal. 2005. Epistasis between mouse Klr and major histocompatibility complex class I loci is associated with a new mechanism of natural killer cell-mediated innate resistance to cytomegalovirus infection. *Nat. Genet.* 37:593–599. doi:10.1038/ng1564
- Dokun, A.O., S. Kim, H.R. Smith, H.S. Kang, D.T. Chu, and W.M. Yokoyama. 2001. Specific and nonspecific NK cell activation during virus infection. *Nat. Immunol.* 2:951–956. doi:10.1038/ni714
- Ehl, S., R. Niesch, T. Tanaka, M. Myasaka, H. Hengartner, and R. Zinkernagel. 1996. A comparison of efficacy and specificity of three NK depleting

- antibodies. *J. Immunol. Methods*. 199:149–153. doi:10.1016/S0022-1759(96)00175-5
- Fodil-Cornu, N., S.H. Lee, S. Belanger, A.P. Makrigrannis, C.A. Biron, R.M. Buller, and S.M. Vidal. 2008. Ly49h-deficient C57BL/6 mice: a new mouse cytomegalovirus-susceptible model remains resistant to unrelated pathogens controlled by the NK gene complex. *J. Immunol.* 181:6394–6405.
- Fodil-Cornu, N., M. Pyzik, and S.M. Vidal. 2010. Use of inbred mouse strains to map recognition receptors of MCMV infected cells in the NK cell gene locus. *Methods Mol. Biol.* 612:393–409. doi:10.1007/978-1-60761-362-6\_27
- Gays, F., J.G. Aust, D.M. Reid, J. Falconer, N. Toyama-Sorimachi, P.R. Taylor, and C.G. Brooks. 2006. Ly49B is expressed on multiple subpopulations of myeloid cells. *J. Immunol.* 177:5840–5851.
- George, T.C., L.H. Mason, J.R. Ortaldo, V. Kumar, and M. Bennett. 1999. Positive recognition of MHC class I molecules by the Ly49D receptor of murine NK cells. *J. Immunol.* 162:2035–2043.
- Gumá, M., A. Angulo, C. Vilches, N. Gómez-Lozano, N. Malats, and M. López-Botet. 2004. Imprint of human cytomegalovirus infection on the NK cell receptor repertoire. *Blood*. 104:3664–3671. doi:10.1182/blood-2004-05-2058
- Gumá, M., M. Budt, A. Sáez, T. Brckalo, H. Hengel, A. Angulo, and M. López-Botet. 2006. Expansion of CD94/NKG2C+ NK cells in response to human cytomegalovirus-infected fibroblasts. *Blood*. 107:3624–3631. doi:10.1182/blood-2005-09-3682
- Hanke, T., H. Takizawa, C.W. McMahon, D.H. Busch, E.G. Pamer, J.D. Miller, J.D. Altman, Y. Liu, D. Cado, F.A. Lemonnier, et al. 1999. Direct assessment of MHC class I binding by seven Ly49 inhibitory NK cell receptors. *Immunity*. 11:67–77. doi:10.1016/S1074-7613(00)80082-5
- Jonjić, S., M. Babić, B. Polić, and A. Krmpotić. 2008. Immune evasion of natural killer cells by viruses. *Curr. Opin. Immunol.* 20:30–38. doi:10.1016/j.coi.2007.11.002
- Kane, K.P., E.T. Silver, and B. Hazes. 2001. Specificity and function of activating Ly-49 receptors. *Immunol. Rev.* 181:104–114. doi:10.1034/j.1600-065X.2001.1810108.x
- Kavanagh, D.G., U.H. Koszinowski, and A.B. Hill. 2001. The murine cytomegalovirus immune evasion protein m4/gp34 forms biochemically distinct complexes with class I MHC at the cell surface and in a pre-Golgi compartment. *J. Immunol.* 167:3894–3902.
- Kielczewska, A., H.S. Kim, L.L. Lanier, N. Dimasi, and S.M. Vidal. 2007. Critical residues at the Ly49 natural killer receptor's homodimer interface determine functional recognition of m157, a mouse cytomegalovirus MHC class I-like protein. *J. Immunol.* 178:369–377.
- Kielczewska, A., M. Pyzik, T. Sun, A. Krmpotić, M.B. Lodoen, M.W. Munks, M. Babic, A.B. Hill, U.H. Koszinowski, S. Jonjic, et al. 2009. Ly49P recognition of cytomegalovirus-infected cells expressing H2-Dk and CMV-encoded m04 correlates with the NK cell antiviral response. *J. Exp. Med.* 206:515–523. doi:10.1084/jem.20080954
- Kleijnen, M.F., J.B. Huppa, P. Lucin, S. Mukherjee, H. Farrell, A.E. Campbell, U.H. Koszinowski, A.B. Hill, and H.L. Ploegh. 1997. A mouse cytomegalovirus glycoprotein, gp34, forms a complex with folded class I MHC molecules in the ER which is not retained but is transported to the cell surface. *EMBO J.* 16:685–694. doi:10.1093/emboj/16.4.685
- Krmpotić, A., I. Bubic, B. Polić, P. Lucin, and S. Jonjic. 2003. Pathogenesis of murine cytomegalovirus infection. *Microbes Infect.* 5:1263–1277. doi:10.1016/j.micinf.2003.09.007
- Lanier, L.L. 2005. NK cell recognition. *Annu. Rev. Immunol.* 23:225–274. doi:10.1146/annurev.immunol.23.021704.115526
- Lanier, L.L. 2008a. Evolutionary struggles between NK cells and viruses. *Nat. Rev. Immunol.* 8:259–268. doi:10.1038/nri2276
- Lanier, L.L. 2008b. Up on the tightrope: natural killer cell activation and inhibition. *Nat. Immunol.* 9:495–502. doi:10.1038/ni1581
- Lanier, L.L., B.C. Corliss, J. Wu, C. Leong, and J.H. Phillips. 1998. Immunoreceptor DAP12 bearing a tyrosine-based activation motif is involved in activating NK cells. *Nature*. 391:703–707. doi:10.1038/35642
- Lee, S.H., A. Zafer, Y. de Repentigny, R. Kothary, M.L. Tremblay, P. Gros, P. Duplay, J.R. Webb, and S.M. Vidal. 2003. Transgenic expression of the activating natural killer receptor Ly49H confers resistance to cytomegalovirus in genetically susceptible mice. *J. Exp. Med.* 197:515–526. doi:10.1084/jem.20021713
- Lee, S.H., K.S. Kim, N. Fodil-Cornu, S.M. Vidal, and C.A. Biron. 2009. Activating receptors promote NK cell expansion for maintenance, IL-10 production, and CD8 T cell regulation during viral infection. *J. Exp. Med.* 206:2235–2251. doi:10.1084/jem.20082387
- Ljunggren, H.G., and K. Kärre. 1985. Host resistance directed selectively against H-2-deficient lymphoma variants. Analysis of the mechanism. *J. Exp. Med.* 162:1745–1759. doi:10.1084/jem.162.6.1745
- Martin, M.P., X. Gao, J.H. Lee, G.W. Nelson, R. Detels, J.J. Goedert, S. Buchbinder, K. Hoots, D. Vlahov, J. Trowsdale, et al. 2002. Epistatic interaction between KIR3DS1 and HLA-B delays the progression to AIDS. *Nat. Genet.* 31:429–434.
- Mason, L.H., J. Willette-Brown, S.K. Anderson, W.G. Alvord, R.L. Klabansky, H.A. Young, and J.R. Ortaldo. 2003. Receptor glycosylation regulates Ly-49 binding to MHC class I. *J. Immunol.* 171:4235–4242.
- Moody, A.M., D. Chui, P.A. Reche, J.J. Priatel, J.D. Marth, and E.L. Reinherz. 2001. Developmentally regulated glycosylation of the CD8alpha beta coreceptor stalk modulates ligand binding. *Cell*. 107:501–512. doi:10.1016/S0092-8674(01)00577-3
- Orange, J.S., S.R. Brodeur, A. Jain, F.A. Bonilla, L.C. Schneider, R. Kretschmer, S. Nurko, W.L. Rasmussen, J.R. Köhler, S.E. Gellis, et al. 2002. Deficient natural killer cell cytotoxicity in patients with IKK-gamma/NEMO mutations. *J. Clin. Invest.* 109:1501–1509.
- Orihuela, M., D.H. Margulies, and W.M. Yokoyama. 1996. The natural killer cell receptor Ly-49A recognizes a peptide-induced conformational determinant on its major histocompatibility complex class I ligand. *Proc. Natl. Acad. Sci. USA*. 93:11792–11797. doi:10.1073/pnas.93.21.11792
- Orr, M.T., J.C. Sun, D.G. Hesselin, H. Arase, J.H. Phillips, T. Takai, and L.L. Lanier. 2009. Ly49H signaling through DAP10 is essential for optimal natural killer cell responses to mouse cytomegalovirus infection. *J. Exp. Med.* 206:807–817. doi:10.1084/jem.20090168
- Ortaldo, J.R., A.T. Mason, R. Winkler-Pickett, A. Raziuddin, W.J. Murphy, and L.H. Mason. 1999. Ly-49 receptor expression and functional analysis in multiple mouse strains. *J. Leukoc. Biol.* 66:512–520.
- Polčić, B., H. Hengel, A. Krmpotić, J. Trgovcich, I. Pavić, P. Luccaroni, S. Jonjić, and U.H. Koszinowski. 1998. Hierarchical and redundant lymphocyte subset control precludes cytomegalovirus replication during latent infection. *J. Exp. Med.* 188:1047–1054. doi:10.1084/jem.188.6.1047
- Scaldo, A.A., P.A. Lyons, N.A. Fitzgerald, C.A. Forbes, W.M. Yokoyama, and G.R. Shellam. 1995. Genetic mapping of Cmv1 in the region of mouse chromosome 6 encoding the NK gene complex-associated loci Ly49 and musNKR-P1. *Genomics*. 27:435–441. doi:10.1006/geno.1995.1074
- Silver, E.T., D.E. Gong, C.S. Chang, A. Amrani, P. Santamaria, and K.P. Kane. 2000. Ly-49P activates NK-mediated lysis by recognizing H-2Dd. *J. Immunol.* 165:1771–1781.
- Silver, E.T., D. Gong, B. Hazes, and K.P. Kane. 2001. Ly-49W, an activating receptor of nonobese diabetic mice with close homology to the inhibitory receptor Ly-49G, recognizes H-2D(k) and H-2D(d). *J. Immunol.* 166:2333–2341.
- Silver, E.T., K.J. Lavender, D.E. Gong, B. Hazes, and K.P. Kane. 2002. Allelic variation in the ectodomain of the inhibitory Ly-49G2 receptor alters its specificity for allogeneic and xenogeneic ligands. *J. Immunol.* 169:4752–4760.
- Sjölin, H., E. Tomasello, M. Mousavi-Jazi, A. Bartolazzi, K. Kärre, E. Vivier, and C. Cerboni. 2002. Pivotal role of KARAP/DAP12 adaptor molecule in the natural killer cell-mediated resistance to murine cytomegalovirus infection. *J. Exp. Med.* 195:825–834. doi:10.1084/jem.20011427
- Smith, H.R., J.W. Heusel, I.K. Mehta, S. Kim, B.G. Dorner, O.V. Naidenko, K. Iizuka, H. Furukawa, D.L. Beckman, J.T. Pingel, et al. 2002. Recognition of a virus-encoded ligand by a natural killer cell activation receptor. *Proc. Natl. Acad. Sci. USA*. 99:8826–8831.
- Stewart, J.C., M.L. Villasmil, and M.W. Frampton. 2007. Changes in fluorescence intensity of selected leukocyte surface markers following fixation. *Cytometry A*. 71:379–385.

- Sumaria, N., S.L. van Dommelen, C.E. Andoniou, M.J. Smyth, A.A. Scalzo, and M.A. Degli-Esposti. 2009. The roles of interferon-gamma and perforin in antiviral immunity in mice that differ in genetically determined NK-cell-mediated antiviral activity. *Immunol. Cell Biol.* 87:559–566. doi:10.1038/icb.2009.41
- Sun, J.C., and L.L. Lanier. 2008. Tolerance of NK cells encountering their viral ligand during development. *J. Exp. Med.* 205:1819–1828. doi:10.1084/jem.20072448
- Sun, J.C., J.N. Beilke, and L.L. Lanier. 2009. Adaptive immune features of natural killer cells. *Nature*. 457:557–561. doi:10.1038/nature07665
- Tassi, I., G. Le Friec, S. Gilfillan, T. Takai, W.M. Yokoyama, and M. Colonna. 2009. DAP10 associates with Ly49 receptors but contributes minimally to their expression and function in vivo. *Eur. J. Immunol.* 39:1129–1135. doi:10.1002/eji.200838972
- Tripathy, S.K., P.A. Keyel, L. Yang, J.T. Pingel, T.P. Cheng, A. Schneeberger, and W.M. Yokoyama. 2008. Continuous engagement of a self-specific activation receptor induces NK cell tolerance. *J. Exp. Med.* 205:1829–1841. doi:10.1084/jem.20072446
- Van Beneden, K., F. Stevenaert, A. De Creus, V. Debacker, J. De Boever, J. Plum, and G. Leclercq. 2001. Expression of Ly49E and CD94/NKG2 on fetal and adult NK cells. *J. Immunol.* 166:4302–4311.
- Vivier, E., E. Tomasello, M. Baratin, T. Walzer, and S. Ugolini. 2008. Functions of natural killer cells. *Nat. Immunol.* 9:503–510. doi:10.1038/ni1582
- Wagner, M., S. Jonjic, U.H. Koszinowski, and M. Messerle. 1999. Systematic excision of vector sequences from the BAC-cloned herpesvirus genome during virus reconstitution. *J. Virol.* 73:7056–7060.
- Xie, X., M.D. Stadnisky, and M.G. Brown. 2009. MHC class I Dk locus and Ly49G2+ NK cells confer H-2k resistance to murine cytomegalovirus. *J. Immunol.* 182:7163–7171. doi:10.4049/jimmunol.0803933
- Yang, H., G. Yogeewaran, J.F. Bukowski, and R.M. Welsh. 1985. Expression of asialo GM1 and other antigens and glycolipids on natural killer cells and spleen leukocytes in virus-infected mice. *Nat. Immun. Cell Growth Regul.* 4:21–39.
- Ziegler, H., R. Thale, P. Lucin, W. Muranyi, T. Flohr, H. Hengel, H. Farrell, W. Rawlinson, and U.H. Koszinowski. 1997. A mouse cytomegalovirus glycoprotein retains MHC class I complexes in the ERGIC/cis-Golgi compartments. *Immunity*. 6:57–66. doi:10.1016/S1074-7613(00)80242-3
